# Supplementary material
Source: PubMed Central journal article supplement (PMC124276)

**Class I: Candidates for snmRNAs exhibiting known sequence or structural motifs**

Group 1: C/D box snoRNAs

Group 2: H/ACA box snoRNAs

Group 3: RNAs from repeats

Group 4: Spliced RNAs

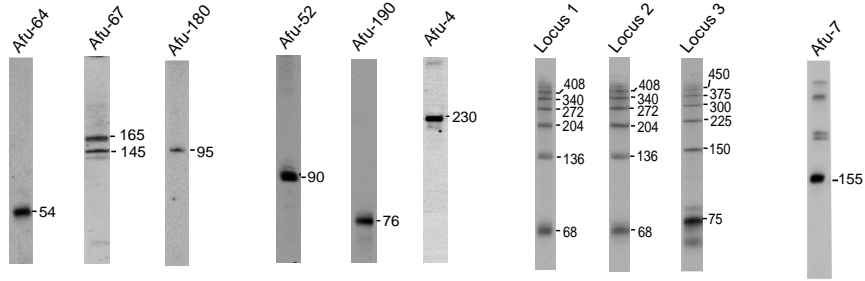

**Class II: Candidates for snmRNAs lacking known sequence or structural motifs**

Group 1: intergenic regions

Group 2: compl. to ORFs

Group 3: overlapping ORFs

Group 4: from ORFs

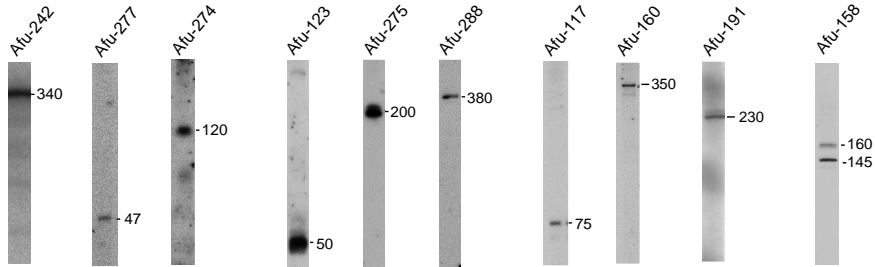

Supplement: pnas_99_11_7536__7.pdf [file pnas_99_11_7536__7.pdf]
