# Supplementary material
Source: PubMed Central journal article supplement (PMC124276)

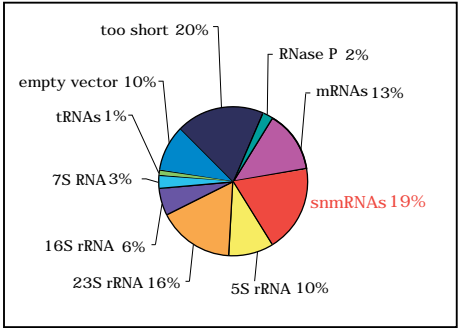

Supplement: pnas_99_11_7536__6.pdf [file pnas_99_11_7536__6.pdf]

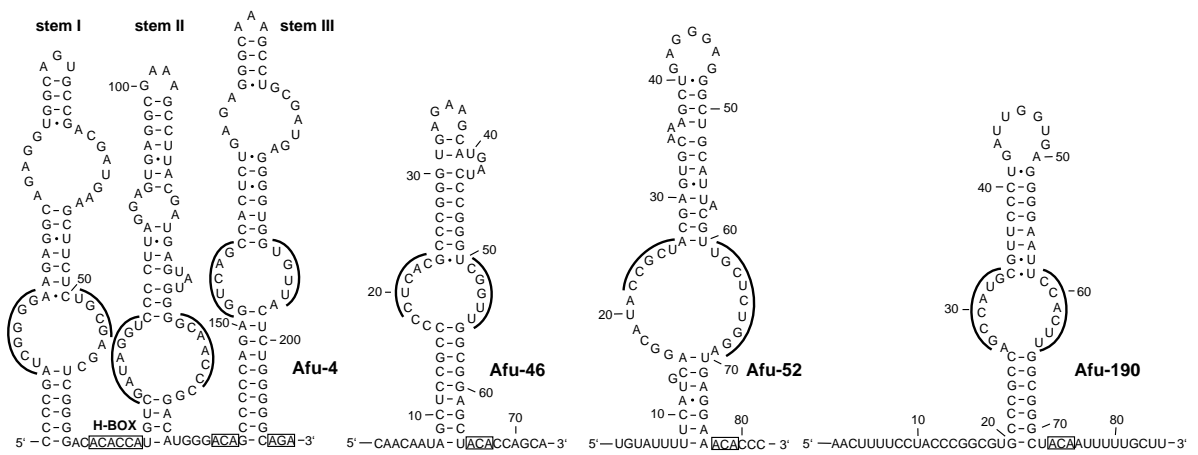

Supplement: pnas_99_11_7536__8.pdf [file pnas_99_11_7536__8.pdf]
